# Supplementary material for: Prediagnostic circulating levels of sex hormones and survival in esophageal adenocarcinoma
Source: PubMed Central journal article supplement (PMC7820945; doi:10.1002/ijc.33285), 2020-09-22
Supplement: IJC-148-905-s001.pdf [file IJC-148-905-s001.pdf]

**Pre-diagnostic Circulating Levels of Sex Hormones and Survival in Esophageal  
Adenocarcinoma**

Shao-Hua Xie, Eivind Ness-Jensen, Hilde Langseth, Randi E. Gislefoss, Fredrik Mattsson,  
Jesper Lagergren

**Supplementary Table 1.** Distributions of circulating levels of sex hormone measures by  
surgical treatment

**Supplementary Table 2.** Pair-wise Spearman's correlation coefficients between circulating  
levels of sex hormone measures

**Supplementary Table 1.** Distributions of circulating levels of sex hormone measures by surgical treatment

| Hormone                                     | Surgical treatment | Mean  | Standard deviation | Median | Lower quartile | Upper quartile | Minimum | Maximum |
|---------------------------------------------|--------------------|-------|--------------------|--------|----------------|----------------|---------|---------|
| Sex hormone-binding globulin, nmol/L        | No                 | 39.8  | 14.5               | 37.0   | 28.0           | 49.5           | 14.0    | 84.0    |
|                                             | Yes                | 43.3  | 17.6               | 40.0   | 31.0           | 54.0           | 12.0    | 89.0    |
| Dehydroepiandrosterone sulfate, $\mu$ mol/L | No                 | 7.0   | 3.4                | 7.1    | 4.6            | 8.6            | 0.3     | 21.2    |
|                                             | Yes                | 7.1   | 3.5                | 6.7    | 4.4            | 9.4            | 1.7     | 20.1    |
| Follicle-stimulating hormone, IU/L          | No                 | 5.1   | 4.0                | 3.9    | 2.9            | 5.7            | 0.7     | 32.2    |
|                                             | Yes                | 4.2   | 2.2                | 3.9    | 2.7            | 4.9            | 0.7     | 13.5    |
| Luteinizing hormone, IU/L                   | No                 | 5.1   | 2.8                | 4.7    | 3.5            | 6.1            | 1.5     | 25.6    |
|                                             | Yes                | 4.7   | 1.8                | 4.6    | 3.2            | 6.1            | 1.5     | 10.2    |
| Prolactin, mIU/L                            | No                 | 150.7 | 91.4               | 140.5  | 80.5           | 187.5          | 28.0    | 627.0   |
|                                             | Yes                | 194.9 | 302.6              | 143.0  | 105.0          | 201.0          | 24.0    | 2690.0  |
| Testosterone, nmol/L                        | No                 | 16.2  | 6.0                | 15.3   | 11.8           | 19.6           | 1.9     | 38.7    |
|                                             | Yes                | 16.6  | 8.2                | 15.3   | 11.1           | 19.8           | 1.7     | 47.7    |
| 17-OH-progesterone, nmol/L                  | No                 | 2.1   | 1                  | 1.9    | 1.4            | 2.5            | 0.3     | 5.8     |
|                                             | Yes                | 2.1   | 1.4                | 1.8    | 1.2            | 2.4            | 0.1     | 8.9     |
| Progesterone, nmol/L                        | No                 | 1.4   | 0.5                | 1.1    | 1.1            | 1.7            | 1.1     | 3.6     |
|                                             | Yes                | 1.3   | 0.4                | 1.1    | 1.1            | 1.6            | 1.1     | 2.7     |
| Estradiol, nmol/L                           | No                 | 0.08  | 0.03               | 0.08   | 0.06           | 0.09           | 0.04    | 0.15    |
|                                             | Yes                | 0.07  | 0.02               | 0.07   | 0.06           | 0.09           | 0.04    | 0.13    |
| Androstenedione, nmol/L                     | No                 | 5.1   | 5.3                | 3.2    | 1.9            | 4.9            | 1.9     | 28.1    |
|                                             | Yes                | 5.5   | 6.5                | 3.1    | 1.9            | 5.8            | 1.9     | 33.7    |
| Testosterone:estradiol ratio                | No                 | 226.0 | 93.8               | 218.6  | 168.7          | 268.8          | 44.8    | 669.4   |
|                                             | Yes                | 236.8 | 107.3              | 219.2  | 152.5          | 282.9          | 24.3    | 581.7   |
| Free testosterone index                     | No                 | 4.3   | 1.4                | 4.2    | 3.4            | 5.3            | 0.4     | 8.9     |
|                                             | Yes                | 4.0   | 1.4                | 3.9    | 3.0            | 4.7            | 0.4     | 8.9     |

**Supplementary Table 2.** Pair-wise Spearman's correlation coefficients between circulating levels of sex hormone measures

| Hormone      | DHEAS | FSH    | LH      | Prolactin | Testosterone | 17-OHP  | Progesterone | Estradiol | AE      | T:E2 ratio | FTI      |
|--------------|-------|--------|---------|-----------|--------------|---------|--------------|-----------|---------|------------|----------|
| SHBG         | 0.013 | 0.114  | 0.271** | 0.136*    | 0.613**      | 0.207** | 0.057        | 0.212**   | 0.118   | 0.432**    | -0.402** |
| DHEAS        |       | -0.120 | -0.006  | 0.014     | 0.056        | -0.085  | 0.451**      | 0.076     | 0.135   | -0.003     | 0.080    |
| FSH          |       |        | 0.493** | 0.015     | 0.113        | -0.052  | -0.062       | 0.147*    | 0.107   | 0.026      | 0.016    |
| LH           |       |        |         | 0.102     | 0.240**      | 0.082   | 0.086        | 0.321**   | 0.192** | -0.018     | -0.008   |
| Prolactin    |       |        |         |           | -0.017       | -0.065  | -0.106       | -0.004    | -0.104  | -0.059     | -0.164*  |
| Testosterone |       |        |         |           |              | 0.486** | 0.067        | 0.395**   | 0.226** | 0.623**    | 0.419**  |
| 17-OHP       |       |        |         |           |              |         | 0.105        | 0.119     | 0.250** | 0.342**    | 0.356**  |
| Progesterone |       |        |         |           |              |         |              | 0.146     | 0.095   | -0.027     | -0.005   |
| Estradiol    |       |        |         |           |              |         |              |           | 0.130   | -0.399**   | 0.220**  |
| AE           |       |        |         |           |              |         |              |           |         | 0.120      | 0.142*   |
| T:E2 ratio   |       |        |         |           |              |         |              |           |         |            | 0.207**  |

\*  $P < 0.05$ ; \*\*  $P < 0.01$

AE: androstenedione; DHEAS: dehydroepiandrosterone sulfate; FSH: follicle stimulating hormone; FTI: free testosterone index; LH: luteinizing hormone; 17-OHP: 17-OH-progesterone; SHBG: sex hormone-binding globulin; T:E2 ratio: testosterone:estradiol ratio
